# Supplementary material
Source: publisher site journal article supplement (https://www.dovepress.com/article/511248)

**SUPPLEMENTARY DATA**

**Supplementary Table 1.** Previous treatments of the study population (*n=130*).

|  | **All cohort (n=130)** | **ADA biosimilar induction (n=89)** | **Switch from ADA originator (n=41)** |
| --- | --- | --- | --- |
| Previous medications |  |  |  |
| Systemic steroids | 69 (53.1%) | 47 (52.8%) | 22 (53.7%) |
| EEN | 67 (51.5%) | 44 (49.4%) | 23 (56.1%) |
| Oral 5-ASA | 30 (23.1%) | 22 (24.7%) | 8 (19.5%) |
| Thiopurines/MTX | 63 (48.5%) | 39 (43.8%) | 24 (58.5%) |
| Infliximab | 17 (13.1%) | 12 (13.5%) | 5 (12.2%) |
| ADA originator | 44 (33.8%) | 3 (3.4%) | 41 (100%) |
| Thalidomide | 6 (4.6%) | 5 (5.6%) | 1 (2.4%) |
| Vedolizumab | 2 (1.5%) | 2 (2.2%) | 0 (0%) |
| Ustekinumab | 3 (2.3%) | 3 (3.4%) | 0 (0%) |
| Tacrolimus | 4 (3.1%) | 2 (2.2%) | 2 (4.9%) |
| Previous surgery | 15 (11.5%) | 11 (12.4%) | 4 (9.8%) |

**Abbreviations:** ADA, adalimumab; EEN, exclusive enteral nutrition; MTX, methotrexate; 5-ASA, 5-aminosalycilic acid.

**Supplementary Table 2.** Scores and laboratory data during follow-up

|  | **Baseline (n=130)** | **Post-induction (n=83)** | **6 months (n=123)** | **12 months (n=100)** | **24 months (n=73)** | **36 months (n=50)** |
| --- | --- | --- | --- | --- | --- | --- |
| PCDAI* | 10 (2.5-22.5) | 0.0 (0.0-7.5) | 0.0 (0.0-8.1) | 0.0 (0.0-5.0) | 0.0 (0.0-5.0) | 0.0 (0.0-5.0) |
| PUCAI* | 10.0 (0.0-20.0) | 0.0 (0.0-10.0) | 0.0 (0.0-10.0) | 0.0 (0.0-12.5) | 0.0 (0.0-0.0) | 0.0 (0.0-0.0) |
| Hb (g/L)* | 125.0 (115.0-134.0) | 129.5 (119.8-139.3) | 133.0 (123.0-142.0) | 135.5 (128.7-145.0) | 136.5 (128.7-150.0) | 141.5 (133.7-150.0) |
| Albumin (g/L)* | 36.0 (32.0-40.0) | 39.0 (35.0-41.0) | 39.0 (36.0-42.0) | 40.0 (38.0-42.2) | 41.0 (37.5-43.0) | 40.0 (37.0-43.0) |
| CRP (mg/L)* | 3.4 (1.0-18.8) | 1.0 (1.0-1.5) | 1.0 (1.0-2.0) | 1.0 (1.0-1.4) | 1.0 (1.0-2.0) | 1.0 (1.0-3.0) |
| ESR (mm/h)* | 13.0 (6.0-27.5) | 9.0 (5.0-17.0) | 8.0 (5.0-13.0) | 7.0 (4.0-13.2) | 6.0 (4.0-11.0) | 8.0 (4.3-11.8) |
| FC (µg/g)* | 789 (246-1161) | 356 (104-799) | 129 (38-398) | 160 (63-499) | 74 (30-339) | 76 (35-392) |
| MINI index* ˚ | 12.0 (6.0-16.0) | 6.0 (0.0-9.0) | 5.0 (-2.0-8.0) | 5.0 (-2.0-7.0) | 1.0 (-3.0-8.0) | 3.0 (0.0-7.7) |
| ADA trough levels* | - | 12.0 (10.5-13.4) | 12.0 (9.9-13.9) | 12.0 (9.9-13.0) | 11.6 (8.8-13.0) | 12.0 (9.2-12.0) |
| Anti-ADA antibodies* (n) | - | 2 (2.4%) | 3 (2.4%) | 2 (2.0%) | 1 (1.4%) | 0 (0.0%) |

**Notes:** *missing data; ˚only for CD patients.

Data are presented as median (interquartile range) for continuous variables and number (%) for categorical variables.

**Abbreviations:** ADA, adalimumab; CRP, C-reactive protein; ESR, erythrosedimentation rate; FC, faecal calprotectin; Hb, haemoglobin; MINI, Mucosal Inflammation Noninvasive; PCDAI, Paediatric Crohn’s Disease activity; PUCAI, Paediatric Ulcerative Colitis Activity Index.

**Supplementary Table 3.** Characteristics of patients who developed anti-Adalimumab antibodies during follow-up

|  | **Cohort** | **Combo therapy** | **Time from biosimilar start (months)** | **Anti-drug antibodies (AU/mL)** | **Drug level (𝜇g/mL)** | **Outcome** |
| --- | --- | --- | --- | --- | --- | --- |
| Patient 1 | Biosimilar induction | no | 3 | 39 | 12 | Antibodies overcome with no intervention |
| Patient 2 | Switch from originator | no | 25 | 18 | 3.8 | Antibodies overcome after dose escalation |
| Patient 3 | Biosimilar induction | no | 3 | 11 | 8.9 | Antibodies overcome with no intervention |
| Patient 4 | Biosimilar induction | no | 6 | positive | <1.3 | Discontinuation after dose escalation attempt |
| Patient 5 | Switch from originator | no | 2 | 12 | 4.4 | Discontinuation |
| Patient 6 | Biosimilar induction | no | 12 | >200 | 4.4 | Antibodies overcome with dose escalation and azathioprine addition |
| Patient 7 | Biosimilar induction | no | 6 | >200 | <0.4 | Discontinuation |

**Supplementary Table 4.** Characteristics of patients who presented injection site reaction during follow-up

|  | **Cohort** | **Biosimilar** | **Adverse events** | **Device** | **Outcome** |
| --- | --- | --- | --- | --- | --- |
| Patient 1 | Biosimilar induction | ABP 501 | Injection site pain | Pen and syringe | Switch to originator |
| Patient 2 | Biosimilar induction | ABP 501 | Injection site pain | Pen | Switch to syringe |
| Patient 3 | Switch from originator | ABP 501 | Injection site pain | Pen | Switch to syringe |
| Patient 4 | Switch from originator | ABP 501 | Injection site pain, associated to tachycardia and chest pain after injection | Syringe (20mg) | Back to originator |
| Patient 5 | Biosimilar induction | ABP 501 | Injection site pain | Pen | Topical anesthetic |
| Patient 6 | Biosimilar induction | ABP 501 | Injection site pain | Pen | Self-resolution |
| Patient 7 | Switch from originator | ABP 501 | Mild injection site pain | Pen | - |
| Patient 8 | Switch from originator | ABP 501 | Injection site pain | Pen and syringe | Back to originator |
| Patient 9 | Switch from originator | ABP 501 | Injection site pain | Pen | - |
| Patient 10 | Switch from originator | ABP 501 | Injection site pain | Pen | - |
| Patient 11 | Switch from originator | ABP 501 | Injection site pain and red lumps at injection site | Pen | Back to originator |
| Patient 12 | Biosimilar induction | ABP 501 | Mild injection site pain | Pen | Self-resolution |
| Patient 13 | Biosimilar induction | ABP 501 | Local reaction | Pen | - |
| Patient 14 | Biosimilar induction | ABP 501 | Injection site pain | Pen | Switch to syringe |
| Patient 15 | Switch from originator | ABP 501 | Injection site pain | Pen | - |
| Patient 16 | Biosimilar induction | ABP 501 | Injection site pain | Pen | Switch to originator |
| Patient 17 | Switch from originator | GP2017 | Injection site pain | Pen | Back to originator |

**Supplementary Table 5.** Comparison of secondary outcomes between patients enrolled at the RHCYP in Edinburgh and those enrolled at the Gaslini Children’s Hospital in Genoa

|  | **RHCYP cohort (n=88)** | **Gaslini cohort (n=42)** | **p-value** |
| --- | --- | --- | --- |
| ADA biosimilars discontinuation | 29 (32.9%) | 14 (33.3%) | 0.966 |
| Clinical remission | 59 (67.0%) | 26 (61.9%) | 0.766 |
| Luminal remission | 32 (36.3%) | 14 (33.3%) | 0.985 |

**Abbreviations:** ADA, adalimumab; RHCYP, Royal Hospital for Children and Young People.

**Supplementary Figure 1.** Kaplan-Meier curves representing different rate of adalimumab (ADA) biosimilar failure in patients enrolled at the Royal Hospital for Children and Young People (RHCYP) in Edinburgh (blue) and those enrolled at the Gaslini Children’s Hospital in Genoa (red). The assumption of proportional hazard was used for analysis, and no violations were observed.


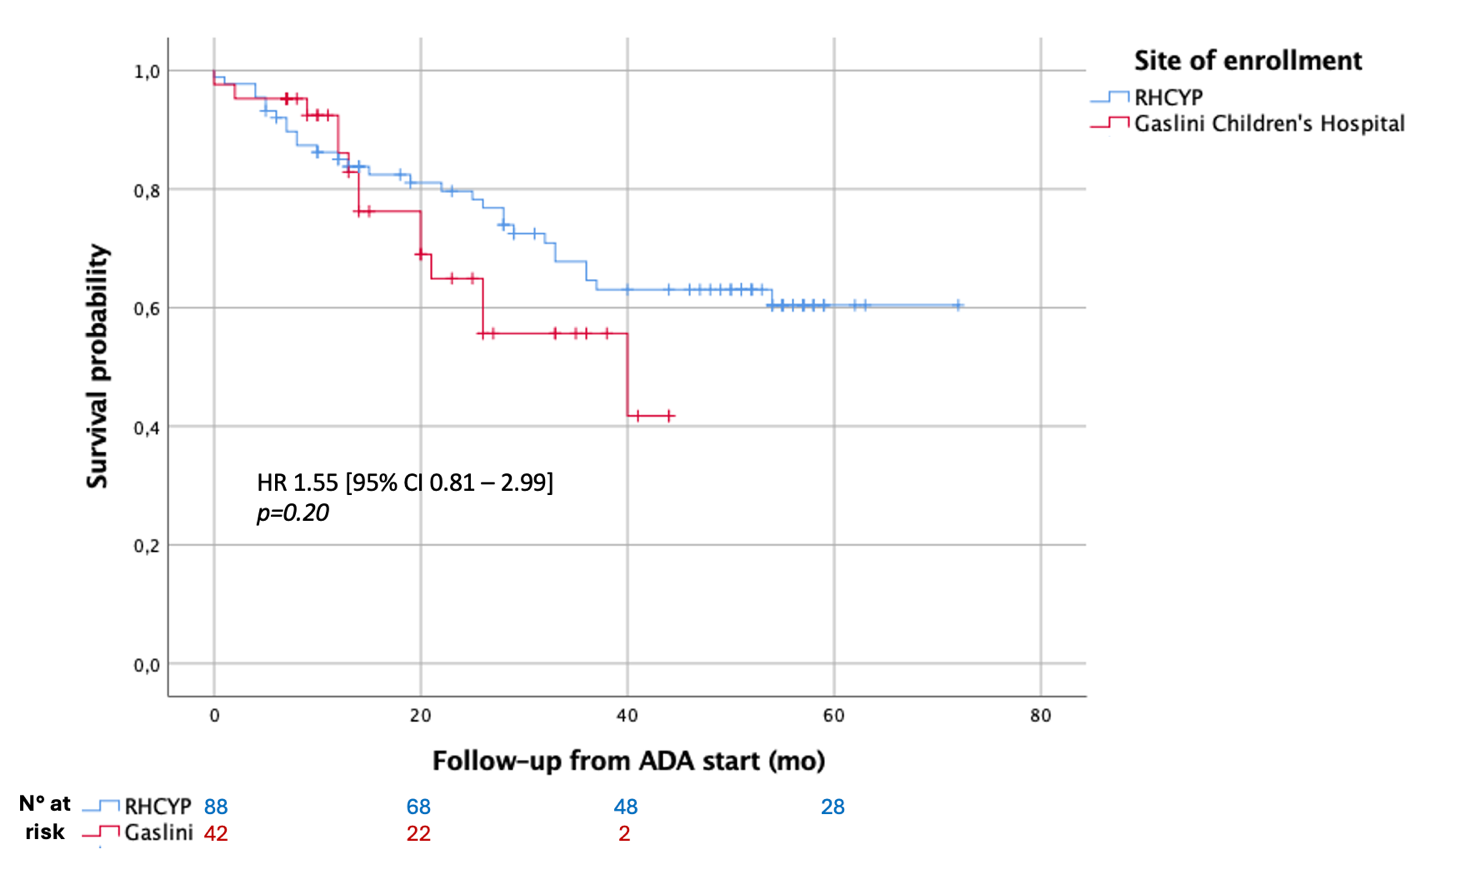

Supplement: Supplementary file 1 [file 511248-Supplementary-data.docx]
